# Supplementary material for: Variable temperature solid-state NMR spectral and relaxation analyses of the impregnation of polyethylene glycol (PEG) into coniferous wood
Source: Royal Society of Chemistry journal article supplement (doi:10.1039/c9ra01848d), 2019-01-01
Supplement: c9ra01848d1.pdf [file c9ra01848d1.pdf]

### A: PEG600 impregnated

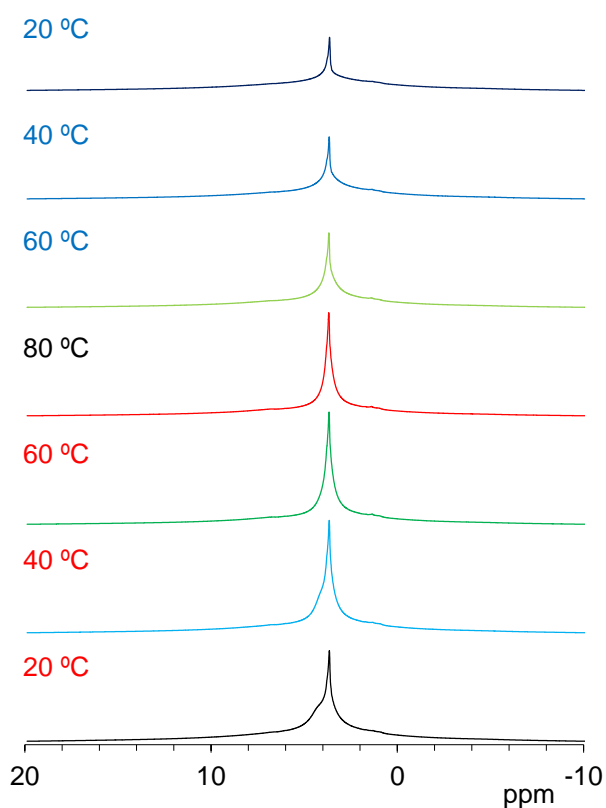

### B: PEG1540 impregnated

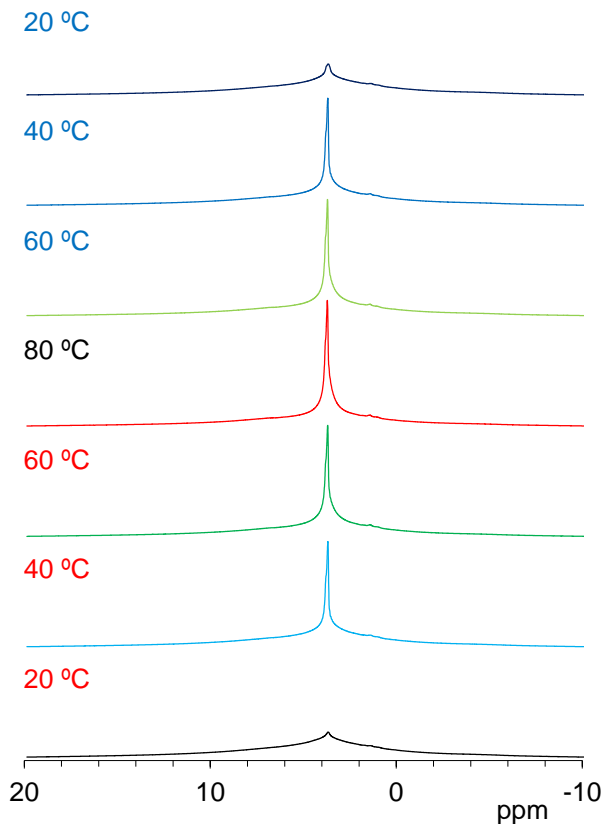

### C: PEG6000 impregnated

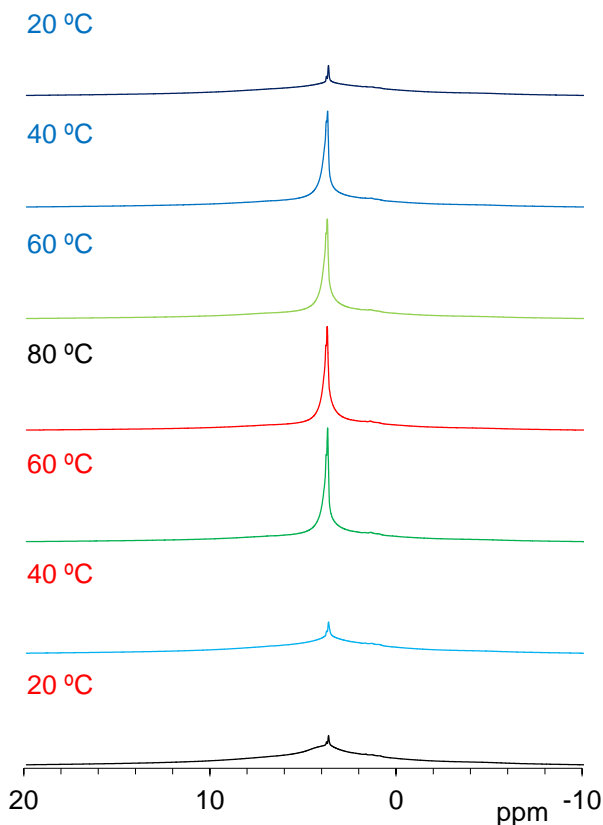

Figure S1. Variable temperature  $^1\text{H}$  MAS NMR spectra of PEG impregnated Japanese cypresses

### A: PEG600

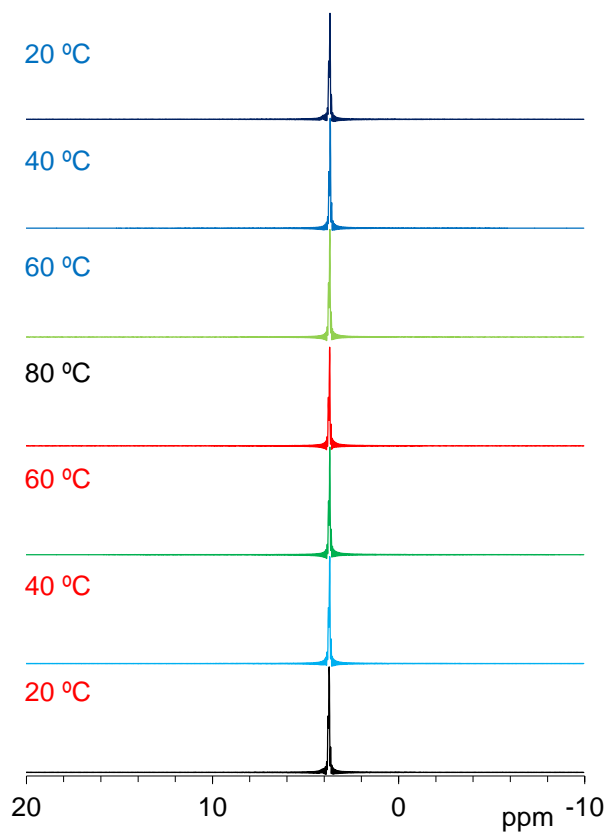

### B: PEG1540

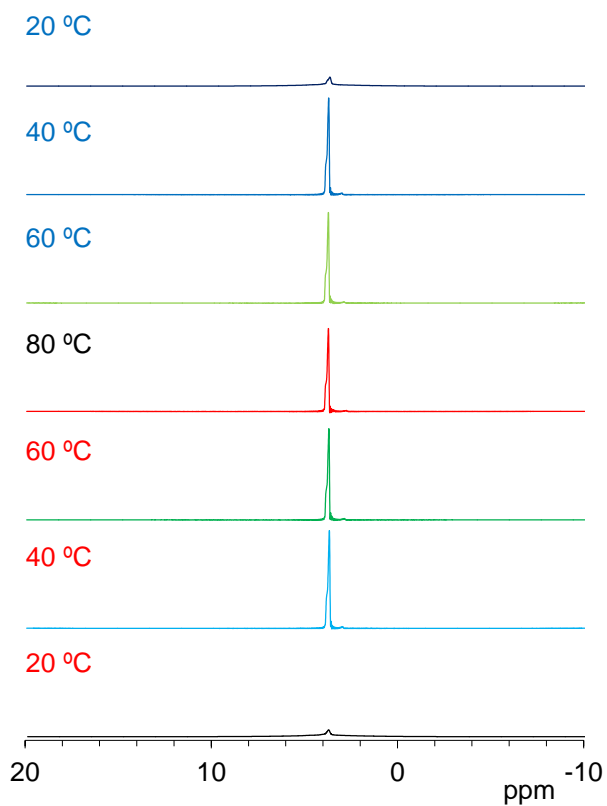

### C: PEG6000

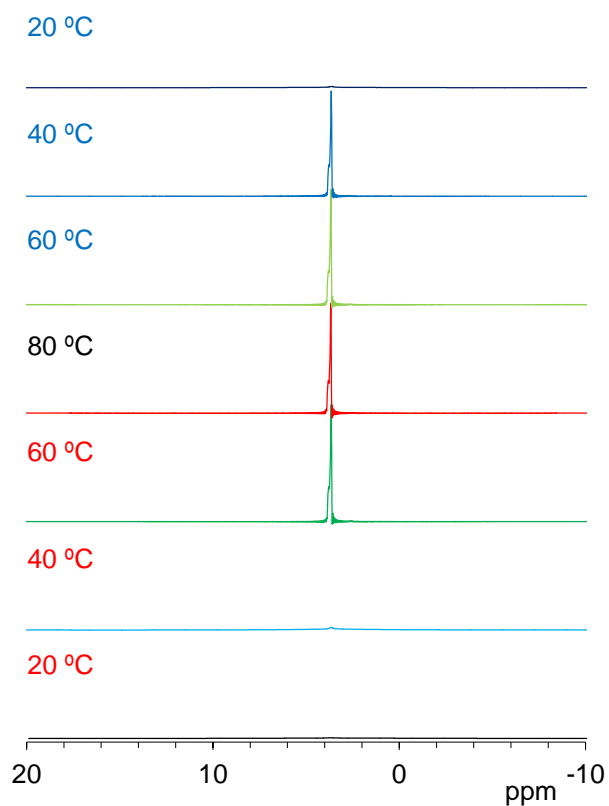

Figure S2. Variable temperature <sup>1</sup>H MAS NMR spectra of PEG

### A: PEG600 impregnated

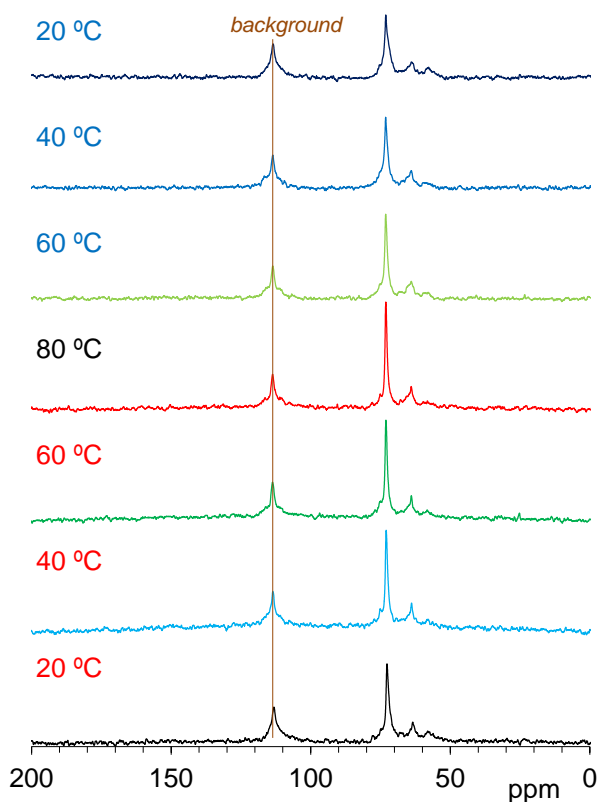

### B: PEG1540 impregnated

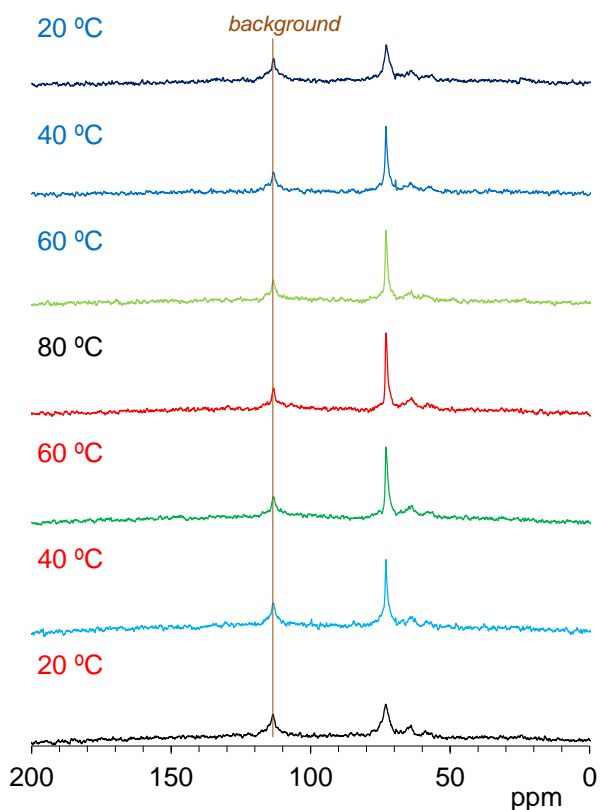

### C: PEG6000 impregnated

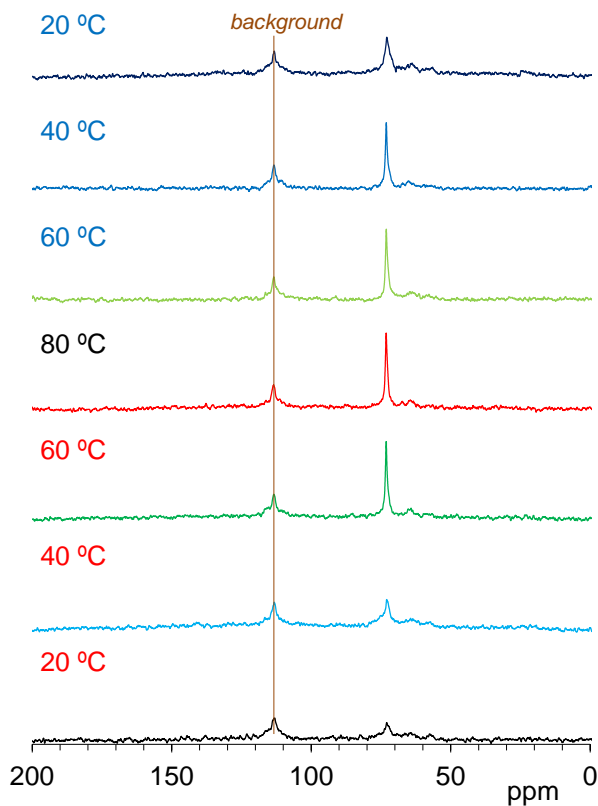

Figure S3. Variable temperature  $^{13}\text{C}$  PST-MAS NMR spectra of PEG impregnated Japanese cypresses

### A: PEG600

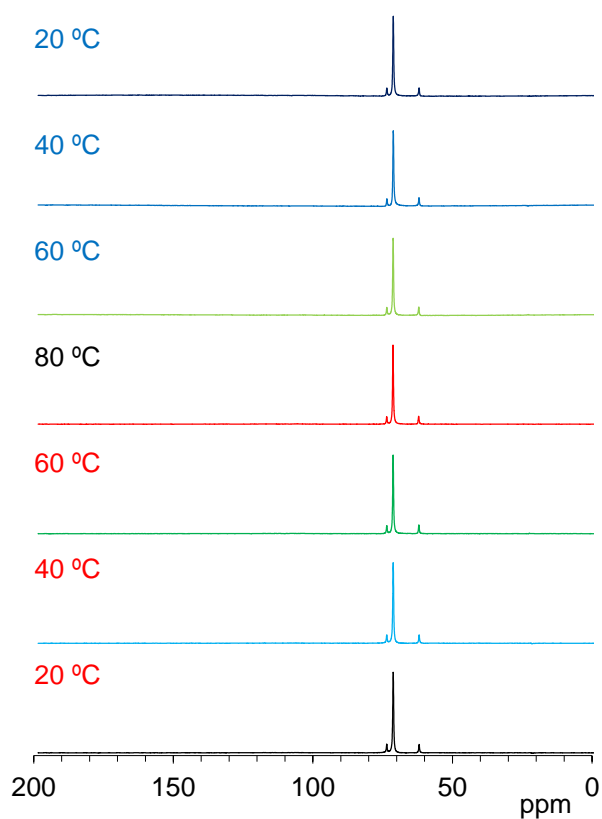

### B: PEG1540

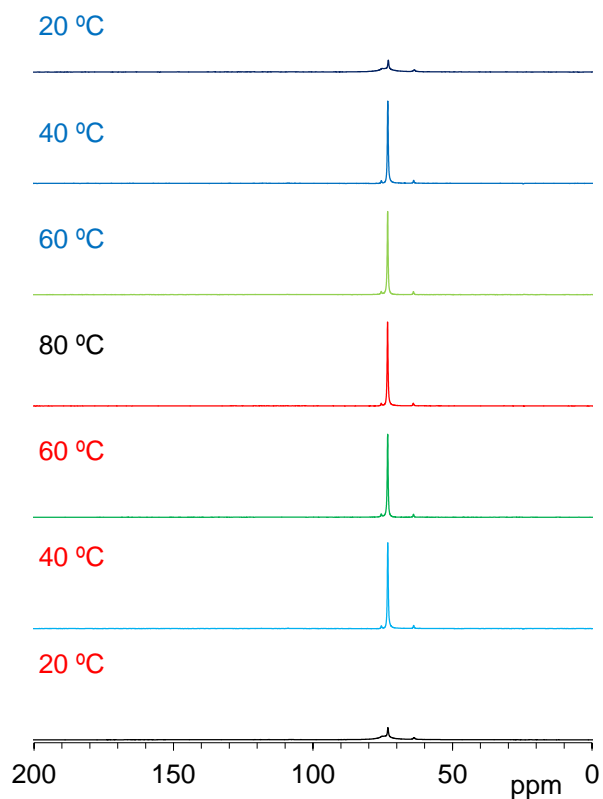

### C: PEG6000

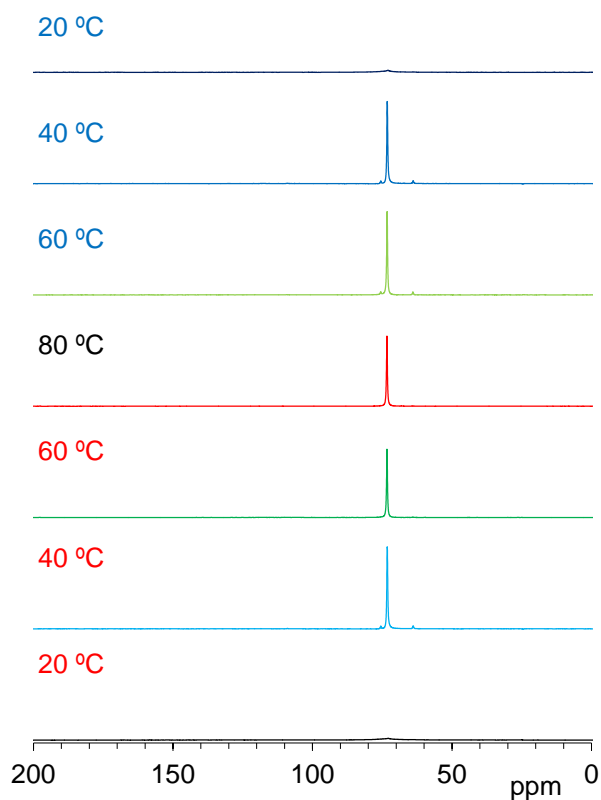

Figure S4. Variable temperature  $^{13}\text{C}$  PST-MAS NMR spectra of PEG

### A: PEG600 impregnated

### B: PEG1540 impregnated

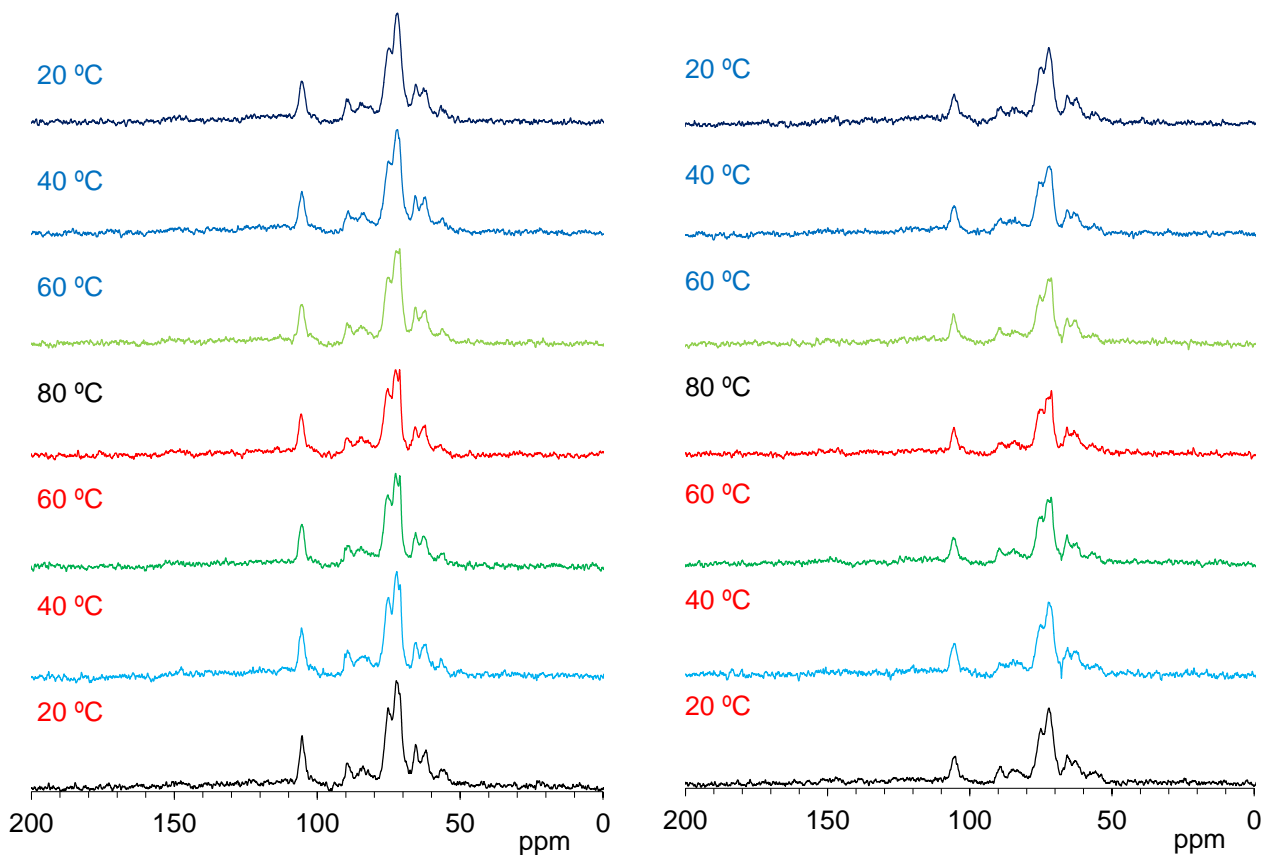

### C: PEG6000 impregnated

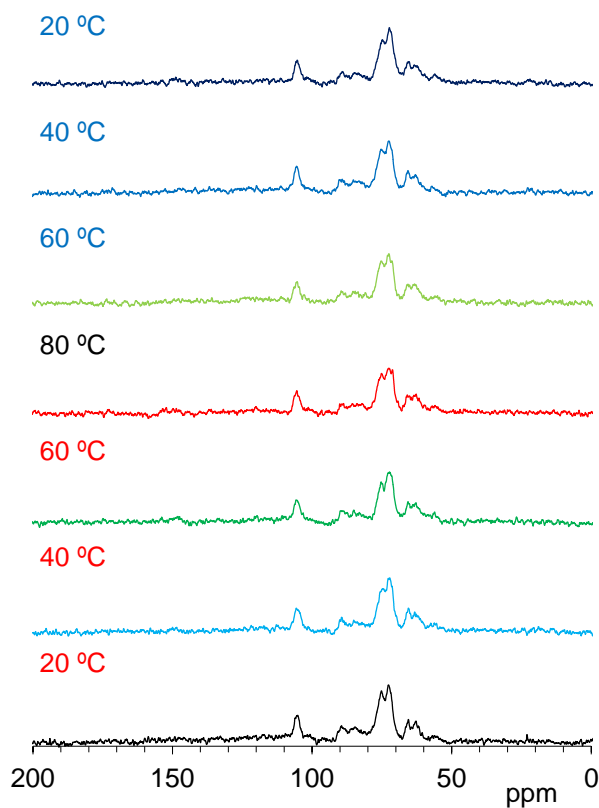

Figure S5. Variable temperature  $^{13}\text{C}$  CP-MAS NMR spectra of PEG impregnated Japanese cypresses

### A: PEG600

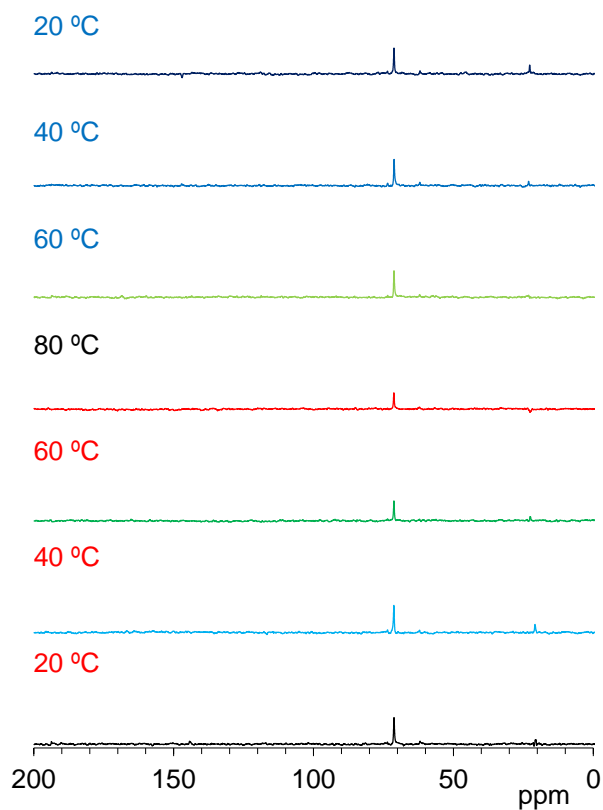

### B: PEG1540

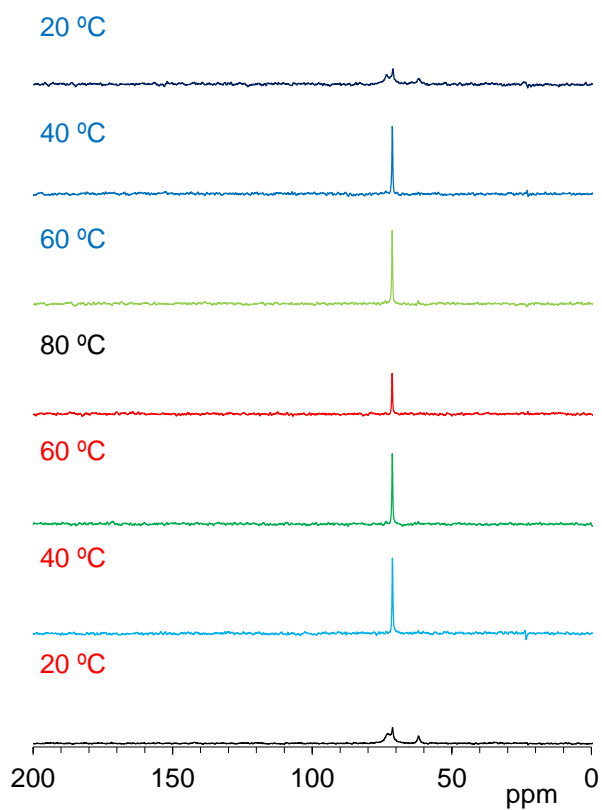

### C: PEG6000

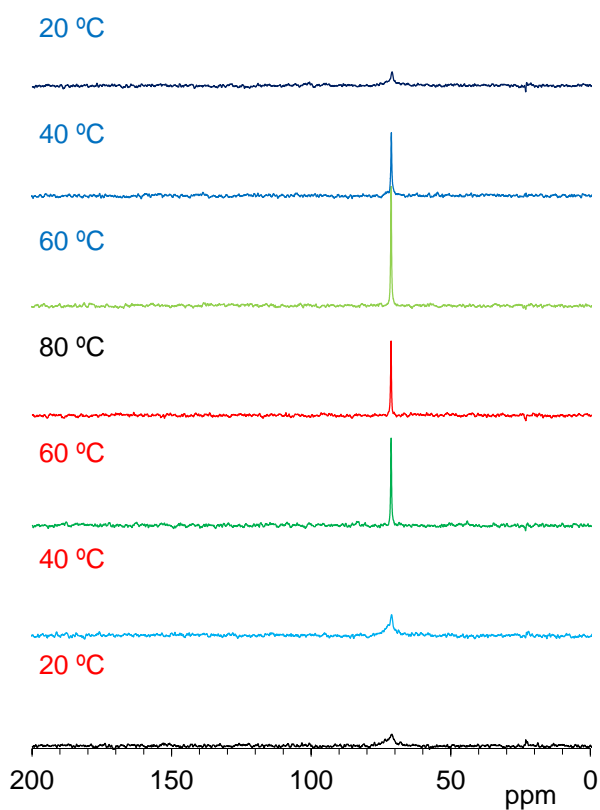

Figure S6. Variable temperature  $^{13}\text{C}$  CP-MAS NMR spectra of PEG
